# Supplementary material
Source: publisher site journal article supplement (https://www.dovepress.com/get_supplementary_file.php?f=273435.docx)
Supplement: Supplementary file 1 [file get_supplementary_file.php]

**Table.S1** The percentage of apoptosis rate, ROS level, and JC-1 monomer rate of A2780 cells which treated with chaetomugilin J, cisplatin, or combination with the two compounds.


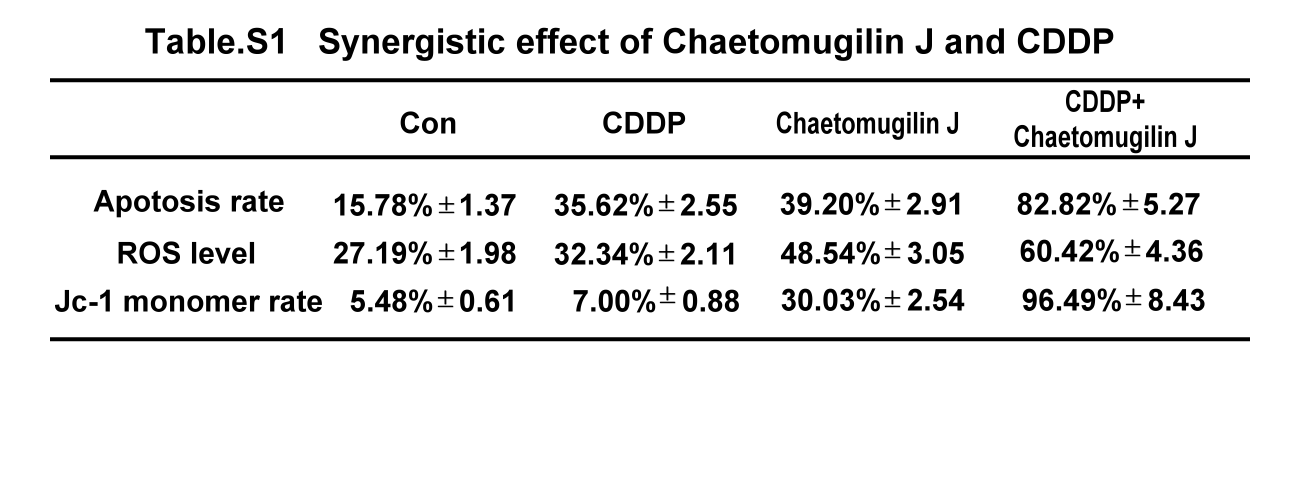


**Fig.S1** The combination index of chaetomugilin J and cisplatin in ovarian cancer A2780 cells. (A) The data of combination index of chaetomugilin J and cisplatin when cells were treated with 0.25 μg/mL chaetomugilin J combined with 1μg/mL, 2 μg/mL or 4 μg/mL cisplatin. (B) The combination index plot of chaetomugilin J and cisplatin when cells were treated with 0.25 μg/mL chaetomugilin J combined with 1μg/mL, 2 μg/mL or 4 μg/mL cisplatin. Data are analyzed by software CalcuSyn 2.0.
